# Supplementary material for: Anti-Psl Targeting of Pseudomonas aeruginosa Biofilms for Neutrophil-Mediated Disruption
Source: PubMed Central journal article supplement (PMC5700069; doi:10.1038/s41598-017-16215-6), 2017-11-22
Supplement: 41598_2017_16215_MOESM1_ESM.pdf [file 41598_2017_16215_MOESM1_ESM.pdf]

1 Anti-Psl Targeting of *Pseudomonas aeruginosa* Biofilms for Neutrophil-Mediated  
2 Disruption

3 Valerie A. Ray<sup>1</sup>, Preston J. Hill<sup>1</sup>, C. Kendall Stover<sup>2</sup>, Sashwati Roy<sup>3,4</sup>, Chandan K. Sen<sup>3,4</sup>,  
4 Li Yu<sup>5</sup>, Daniel J. Wozniak<sup>1</sup>, Antonio DiGiandomenico<sup>2\*</sup>

5

6 <sup>1</sup> Center for Microbial Interface Biology, Departments of Microbial Infection and  
7 Immunity, Microbiology, Ohio State University, Columbus, OH 43210, USA.

8

9 <sup>2</sup> Department of Infectious Diseases, MedImmune, LLC, Gaithersburg, MD 20878, USA.

10

11 <sup>3</sup> Comprehensive Wound Center, Davis Heart and Lung Research Institute, Centers for  
12 Regenerative Medicine and Cell Based Therapies, Ohio State University Medical Center,  
13 Columbus, OH 43210, USA.

14

15 <sup>4</sup> Department of Surgery, College of Veterinary Medicine, Ohio State University,  
16 Columbus, OH 43210, USA.

17

<sup>5</sup> Translational Sciences, MedImmune, LLC, Gaithersburg, MD 20878, USA.

18

19

20 **Supplemental Information**

21 **Supplementary Fig. S1. Structure of Psl and synthetic Psl oligosaccharides.** (A) Cell-  
22 free Psl is a pentasaccharide repeat unit. (B-E) Synthetic Psl oligosaccharides used to  
23 evaluate binding of anti-Psl mAbs which recognized unique epitopes (class I, II and III) <sup>1</sup>.  
24 (B) Psl tetrasaccharide – bound by the class II mAb. (C) Psl pentasaccharide – bound by  
25 the class II mAb, (D) Psl hexasaccharide – bound by class II and class III mAbs. (E) Psl  
26 di-pentasaccharide – bound by the class II mAb and weakly by the class III mAb.

27

28 **Supplementary Fig. S2.** Individual anti-Psl mAbs stain PAO1 biofilms. Flow grown  
29 biofilms of PAO1 stained with either (A) class I (green), (B) class II (orange), or (C)  
30 class III (red) anti-Psl mAbs, imaged via CLSM at 10x magnification, and processed via  
31 IMARIS. Scale bars represent 150  $\mu\text{m}$ .

32

33 **Supplementary Fig. S3. Thermally injured porcine tissue does not react with an**  
34 **isotype control IgG mAb.** *P. aeruginosa* infected skin from thermally injured pigs was  
35 imaged via CLSM at 10x magnification. (A) DIC image (same as Fig. 3), (B) DAPI  
36 staining, and (C) control IgG mAb staining. (D-F) The wound bed is below the white  
37 dotted line and white dashed line represents below the wound bed. Scale bars represent  
38 100  $\mu\text{m}$ .

39

40 **Supplementary Figure S4. Anti-Psl mAbs elicit a phagocytic burst response from**  
41 **human neutrophils.** Planktonic PAO1 was incubated with neutrophils and PMA  
42 (positive control), non-opsonized or IgG isotype control antibody (negative controls), or

43 opsonized with human serum, individual anti-Psl mAbs, or a combination of all three  
44 mAbs.

45

46 **Supplementary Movie S1. Anti-Psl mAbs differentially stain the biofilm.** IMARIS

47 generated movie from image shown in Figure 2B with removal of layers (class I – green,

48 class II – yellow/orange, and class III – red) and rotation to demonstrate differential

49 staining.

50

51

52 **Supplementary Fig. S1**

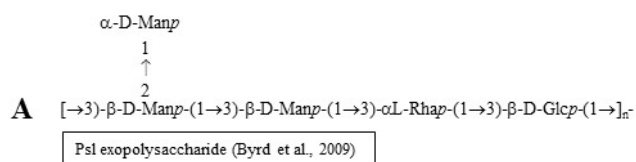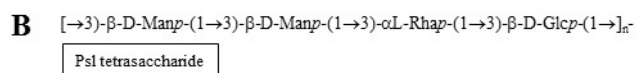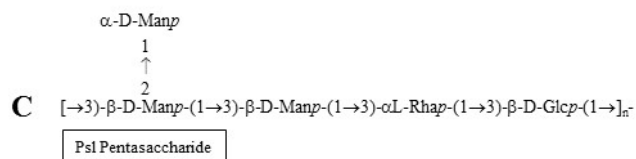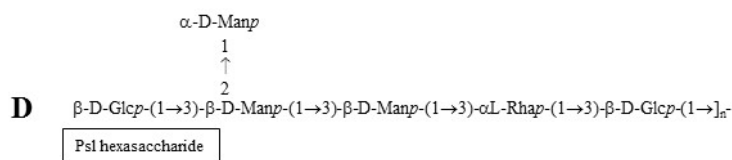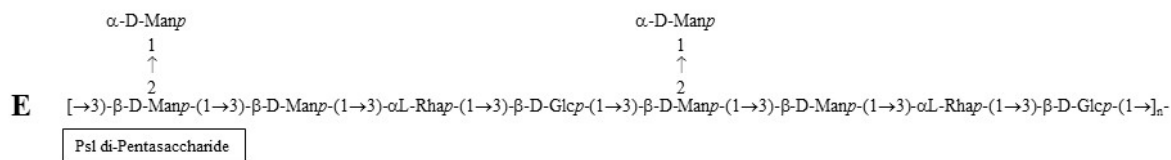

53

54 **Supplementary Fig. 2**

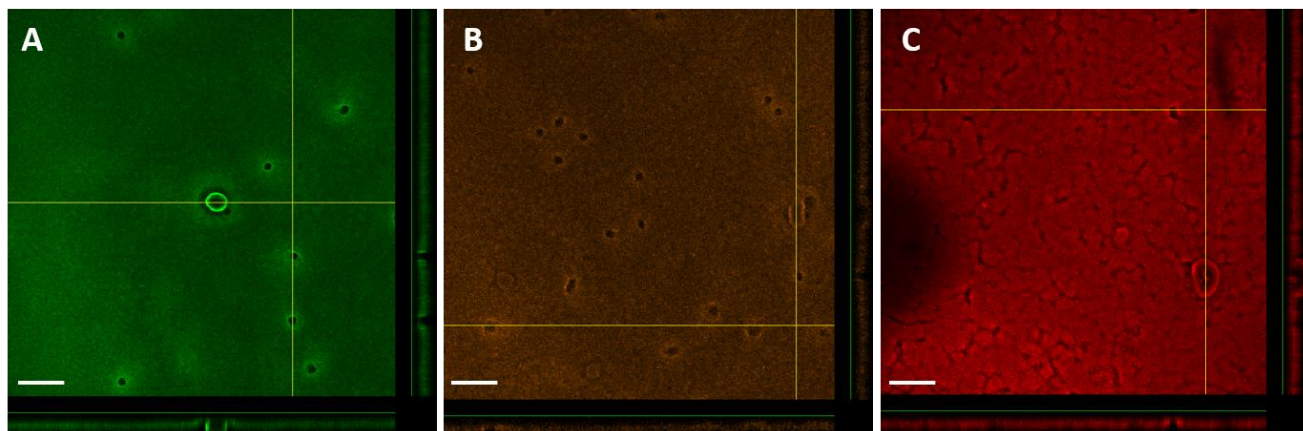

56 **Supplementary Fig. S3**

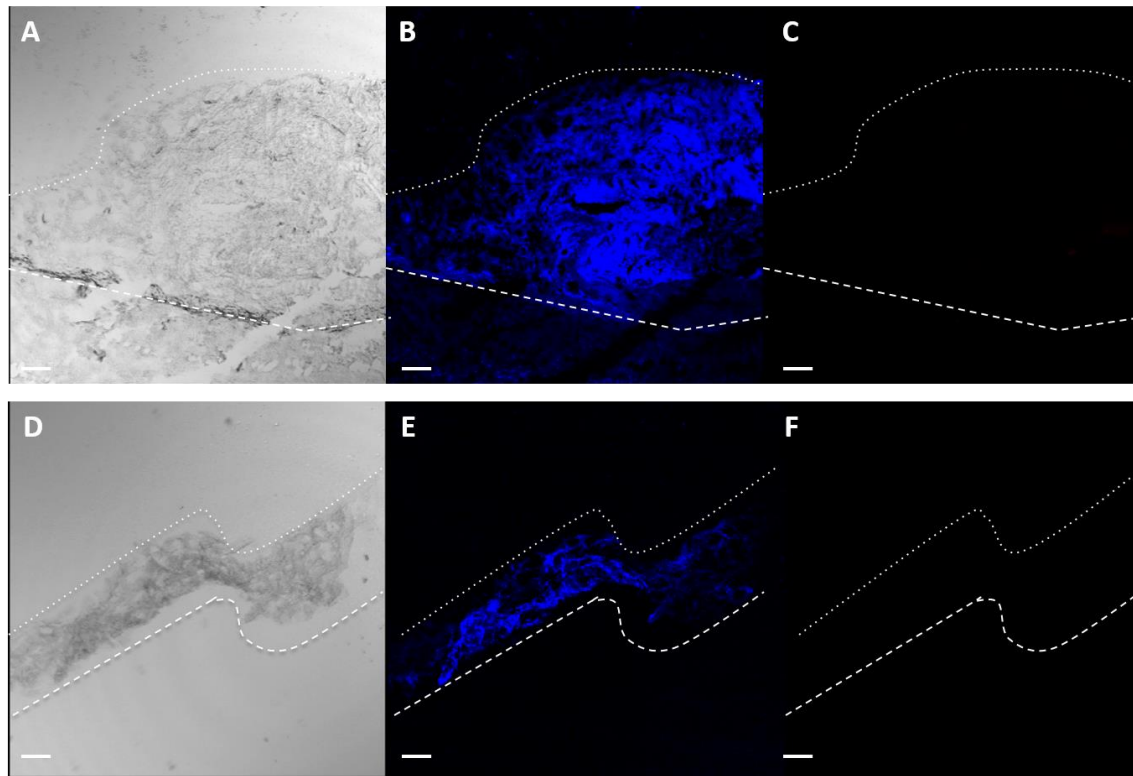

57

58

59 **Supplementary Fig. S4**

60

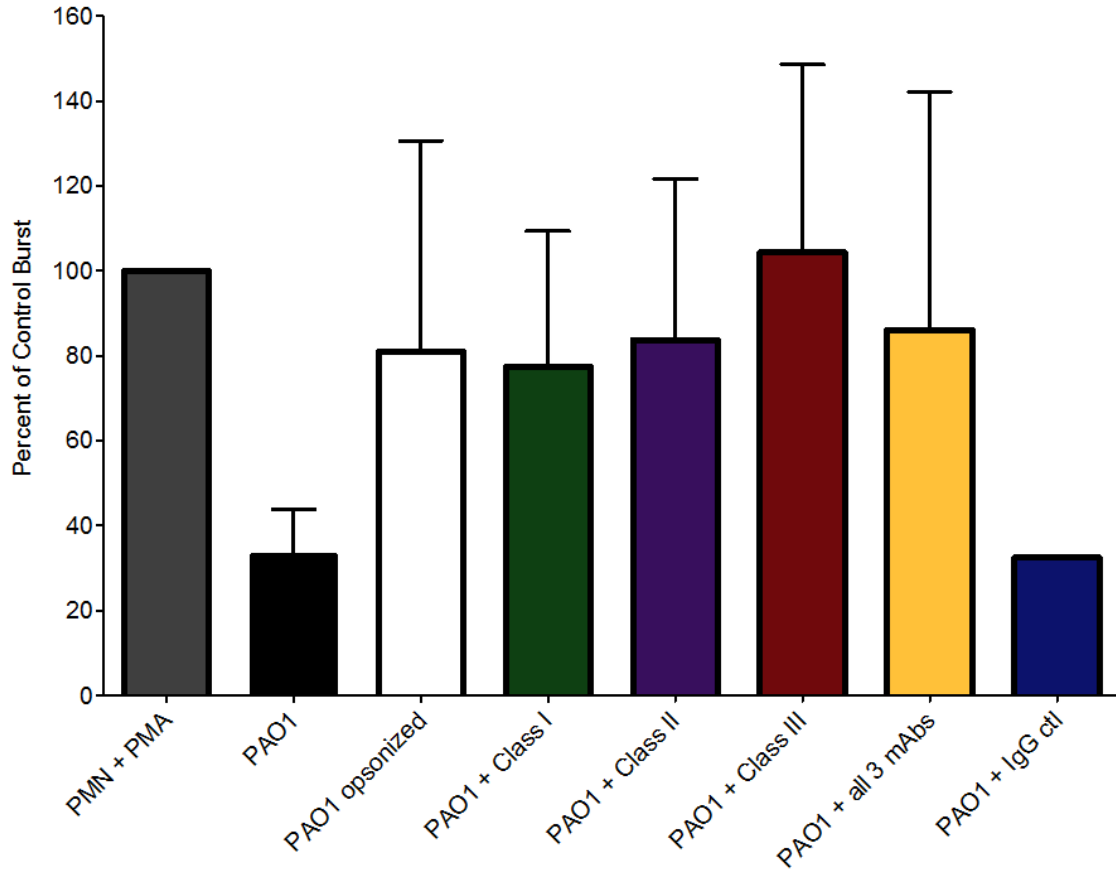

61

62 **Supplementary TABLE S1.** Raw data from biofilm attachment assays.

63 *Experiment 1*

| 64 | <u>Condition</u> | <u>O.D. A<sub>540</sub></u> | <u>Condition</u> | <u>O.D. A<sub>540</sub></u> |
|----|------------------|-----------------------------|------------------|-----------------------------|
| 65 |                  |                             |                  |                             |
| 66 |                  |                             |                  |                             |
| 67 | $\Delta psl$ #1  | 0.033                       | PAO1 #1          | 0.121                       |
| 68 | $\Delta psl$ #2  | 0.038                       | PAO1 #2          | 0.158                       |
| 69 | $\Delta psl$ #3  | 0.050                       | PAO1 #3          | 0.128                       |
| 70 |                  |                             |                  |                             |
| 71 | IgG Control #1   | 0.111                       | Class I #1       | 0.037                       |
| 72 | IgG Control #2   | 0.150                       | Class I #2       | 0.056                       |
| 73 | IgG Control #3   | 0.135                       | Class I #3       | 0.070                       |
| 74 |                  |                             |                  |                             |
| 75 | Class II #1      | 0.070                       | Class III #1     | 0.080                       |
| 76 | Class II #2      | 0.126                       | Class III #2     | 0.081                       |
| 77 | Class II #3      | 0.141                       | Class III #3     | 0.059                       |
| 78 |                  |                             |                  |                             |
| 79 | All 3 mAbs #1    | 0.102                       |                  |                             |
| 80 | All 3 mAbs #2    | 0.121                       |                  |                             |
| 81 | All 3 mAbs #3    | 0.106                       |                  |                             |

82  
83 *Experiment 2*

| 84  | <u>Condition</u> | <u>O.D. A<sub>540</sub></u> | <u>Condition</u> | <u>O.D. A<sub>540</sub></u> |
|-----|------------------|-----------------------------|------------------|-----------------------------|
| 85  |                  |                             |                  |                             |
| 86  |                  |                             |                  |                             |
| 87  | $\Delta psl$ #1  | 0.049                       | PAO1 #1          | 0.146                       |
| 88  | $\Delta psl$ #2  | 0.060                       | PAO1 #2          | 0.155                       |
| 89  | $\Delta psl$ #3  | 0.057                       | PAO1 #3          | 0.166                       |
| 90  |                  |                             |                  |                             |
| 91  | IgG Control #1   | 0.143                       | Class I #1       | 0.066                       |
| 92  | IgG Control #2   | 0.160                       | Class I #2       | 0.129                       |
| 93  | IgG Control #3   | 0.150                       | Class I #3       | 0.116                       |
| 94  |                  |                             |                  |                             |
| 95  | Class II #1      | 0.128                       | Class III #1     | 0.162                       |
| 96  | Class II #2      | 0.112                       | Class III #2     | 0.088                       |
| 97  | Class II #3      | 0.137                       | Class III #3     | 0.071                       |
| 98  |                  |                             |                  |                             |
| 99  | All 3 mAbs #1    | 0.122                       |                  |                             |
| 100 | All 3 mAbs #2    | 0.134                       |                  |                             |
| 101 | All 3 mAbs #3    | 0.105                       |                  |                             |

102  
103 *Experiment 3*

| 104 | <u>Condition</u> | <u>O.D. A<sub>540</sub></u> | <u>Condition</u> | <u>O.D. A<sub>540</sub></u> |
|-----|------------------|-----------------------------|------------------|-----------------------------|
| 105 |                  |                             |                  |                             |
| 106 |                  |                             |                  |                             |
| 107 | $\Delta psl$ #1  | 0.031                       | PAO1 #1          | 0.155                       |
| 108 | $\Delta psl$ #2  | 0.059                       | PAO1 #2          | 0.174                       |
| 109 | $\Delta psl$ #3  | 0.061                       | PAO1 #3          | 0.168                       |
| 110 |                  |                             |                  |                             |
| 111 | IgG Control #1   | 0.164                       | Class I #1       | 0.080                       |
| 112 | IgG Control #2   | 0.173                       | Class I #2       | 0.122                       |
| 113 | IgG Control #3   | 0.159                       | Class I #3       | 0.047                       |
| 114 |                  |                             |                  |                             |



|     |                     |                             |                  |                             |
|-----|---------------------|-----------------------------|------------------|-----------------------------|
| 115 | Class II #1         | 0.293                       | Class III #1     | 0.155                       |
| 116 | Class II #2         | 0.108                       | Class III #2     | 0.107                       |
| 117 | Class II #3         | 0.115                       | Class III #3     | 0.102                       |
| 118 |                     |                             |                  |                             |
| 119 | All 3 mAbs #1       | 0.104                       |                  |                             |
| 120 | All 3 mAbs #2       | 0.092                       |                  |                             |
| 121 | All 3 mAbs #3       | 0.104                       |                  |                             |
| 122 |                     |                             |                  |                             |
| 123 | <i>Experiment 4</i> |                             |                  |                             |
| 124 |                     |                             |                  |                             |
| 125 | <u>Condition</u>    | <u>O.D. A<sub>540</sub></u> | <u>Condition</u> | <u>O.D. A<sub>540</sub></u> |
| 126 |                     |                             |                  |                             |
| 127 | $\Delta psl$ #1     | 0.067                       | PAO1 #1          | 0.129                       |
| 128 | $\Delta psl$ #2     | 0.067                       | PAO1 #2          | 0.152                       |
| 129 | $\Delta psl$ #3     | 0.048                       | PAO1 #3          | 0.147                       |
| 130 |                     |                             |                  |                             |
| 131 | IgG Control #1      | 0.105                       | Class I #1       | 0.103                       |
| 132 | IgG Control #2      | 0.125                       | Class I #2       | 0.117                       |
| 133 | IgG Control #3      | 0.155                       | Class I #3       | 0.127                       |
| 134 |                     |                             |                  |                             |
| 135 | Class II #1         | 0.111                       | Class III #1     | 0.110                       |
| 136 | Class II #2         | 0.122                       | Class III #2     | 0.112                       |
| 137 | Class II #3         | 0.133                       | Class III #3     | 0.133                       |
| 138 |                     |                             |                  |                             |
| 139 | All 3 mAbs #1       | 0.106                       |                  |                             |
| 140 | All 3 mAbs #2       | 0.121                       |                  |                             |
| 141 | All 3 mAbs #3       | 0.120                       |                  |                             |
| 142 |                     |                             |                  |                             |
| 143 |                     |                             |                  |                             |

144 **Supplementary TABLE S2.** Raw data from biofilm aggregation assays.

145 *Experiment 1*

| 146 | 147 <u>Condition</u> | <u>O.D. A<sub>600</sub></u> | <u>O.D.A<sub>490</sub></u> | <u>Aggregation Index (A<sub>490</sub>/A<sub>600</sub>)</u> |
|-----|----------------------|-----------------------------|----------------------------|------------------------------------------------------------|
| 148 |                      |                             |                            |                                                            |
| 149 | <i>Δpsl</i> #1       | 0.091                       | 1.134                      | 12.462                                                     |
| 150 | <i>Δpsl</i> #2       | 0.093                       | 1.122                      | 12.065                                                     |
| 151 | <i>Δpsl</i> #3       | 0.093                       | 1.142                      | 12.280                                                     |
| 152 |                      |                             |                            |                                                            |
| 153 | WFPA 801 #1          | 0.072                       | 1.196                      | 16.611                                                     |
| 154 | WFPA 801 #2          | 0.071                       | 1.114                      | 15.690                                                     |
| 155 | WFPA 801 #3          | 0.074                       | 1.160                      | 15.676                                                     |
| 156 |                      |                             |                            |                                                            |
| 157 | WFPA 801 + ara #1    | 0.040                       | 0.940                      | 23.500                                                     |
| 158 | WFPA 801 + ara #2    | 0.043                       | 1.000                      | 23.256                                                     |
| 159 | WFPA 801 + ara #3    | 0.045                       | 1.044                      | 23.200                                                     |
| 160 |                      |                             |                            |                                                            |
| 161 | IgG Control #1       | 0.044                       | 1.000                      | 22.727                                                     |
| 162 | IgG Control #2       | 0.042                       | 0.982                      | 23.381                                                     |
| 163 | IgG Control #3       | 0.044                       | 1.018                      | 23.136                                                     |
| 164 |                      |                             |                            |                                                            |
| 165 | Class I #1           | 0.054                       | 1.068                      | 19.778                                                     |
| 166 | Class I #2           | 0.053                       | 1.036                      | 19.547                                                     |
| 167 | Class I #3           | 0.056                       | 1.092                      | 19.500                                                     |
| 168 |                      |                             |                            |                                                            |
| 169 | Class II #1          | 0.053                       | 1.066                      | 20.113                                                     |
| 170 | Class II #2          | 0.055                       | 1.058                      | 19.236                                                     |
| 171 | Class II #3          | 0.048                       | 1.038                      | 21.625                                                     |
| 172 |                      |                             |                            |                                                            |
| 173 | Class III #1         | 0.049                       | 1.100                      | 22.449                                                     |
| 174 | Class III #2         | 0.048                       | 1.068                      | 22.208                                                     |
| 175 | Class III #3         | 0.050                       | 1.114                      | 22.280                                                     |
| 176 |                      |                             |                            |                                                            |
| 177 | All 3 mAbs #1        | 0.066                       | 1.210                      | 18.333                                                     |
| 178 | All 3 mAbs #2        | 0.059                       | 1.068                      | 18.102                                                     |
| 179 | All 3 mAbs #3        | 0.060                       | 1.136                      | 18.933                                                     |

180  
181  
182 *Experiment 2*

| 183 | 184 <u>Condition</u> | <u>O.D. A<sub>600</sub></u> | <u>O.D.A<sub>490</sub></u> | <u>Aggregation Index (A<sub>490</sub>/A<sub>600</sub>)</u> |
|-----|----------------------|-----------------------------|----------------------------|------------------------------------------------------------|
| 185 |                      |                             |                            |                                                            |
| 186 | <i>Δpsl</i> #1       | 0.090                       | 1.016                      | 11.289                                                     |
| 187 | <i>Δpsl</i> #2       | 0.094                       | 1.111                      | 11.819                                                     |
| 188 | <i>Δpsl</i> #3       | 0.103                       | 1.158                      | 11.243                                                     |
| 189 |                      |                             |                            |                                                            |
| 190 | WFPA 801 #1          | 0.071                       | 1.098                      | 15.465                                                     |
| 191 | WFPA 801 #2          | 0.074                       | 1.128                      | 15.243                                                     |
| 192 | WFPA 801 #3          | 0.080                       | 1.210                      | 15.125                                                     |
| 193 |                      |                             |                            |                                                            |
| 194 | WFPA 801 + ara #1    | 0.053                       | 1.106                      | 20.868                                                     |
| 195 | WFPA 801 + ara #2    | 0.055                       | 1.130                      | 20.545                                                     |
| 196 | WFPA 801 + ara #3    | 0.059                       | 1.186                      | 20.102                                                     |
| 197 |                      |                             |                            |                                                            |

|     |                     |                             |                            |                                                            |
|-----|---------------------|-----------------------------|----------------------------|------------------------------------------------------------|
| 198 | IgG Control #1      | 0.056                       | 1.112                      | 19.857                                                     |
| 199 | IgG Control #2      | 0.059                       | 1.100                      | 18.644                                                     |
| 200 | IgG Control #3      | 0.057                       | 1.168                      | 20.491                                                     |
| 201 |                     |                             |                            |                                                            |
| 202 | Class I #1          | 0.057                       | 1.054                      | 18.491                                                     |
| 203 | Class I #2          | 0.057                       | 1.096                      | 19.228                                                     |
| 204 | Class I #3          | 0.059                       | 1.102                      | 18.678                                                     |
| 205 |                     |                             |                            |                                                            |
| 206 | Class II #1         | 0.056                       | 1.044                      | 18.643                                                     |
| 207 | Class II #2         | 0.058                       | 1.138                      | 19.621                                                     |
| 208 | Class II #3         | 0.058                       | 1.162                      | 20.034                                                     |
| 209 |                     |                             |                            |                                                            |
| 210 | Class III #1        | 0.051                       | 1.038                      | 20.353                                                     |
| 211 | Class III #2        | 0.058                       | 1.344                      | 23.172                                                     |
| 212 | Class III #3        | 0.057                       | 1.122                      | 19.684                                                     |
| 213 |                     |                             |                            |                                                            |
| 214 | All 3 mAbs #1       | 0.062                       | 0.994                      | 16.032                                                     |
| 215 | All 3 mAbs #2       | 0.063                       | 1.008                      | 16.000                                                     |
| 216 | All 3 mAbs #3       | 0.066                       | 1.060                      | 16.061                                                     |
| 217 |                     |                             |                            |                                                            |
| 218 |                     |                             |                            |                                                            |
| 219 |                     |                             |                            |                                                            |
| 220 | <i>Experiment 3</i> |                             |                            |                                                            |
| 221 |                     |                             |                            |                                                            |
| 222 | <u>Condition</u>    | <u>O.D. A<sub>600</sub></u> | <u>O.D.A<sub>490</sub></u> | <u>Aggregation Index (A<sub>490</sub>/A<sub>600</sub>)</u> |
| 223 |                     |                             |                            |                                                            |
| 224 | $\Delta$ psl #1     | 0.120                       | 0.849                      | 7.075                                                      |
| 225 | $\Delta$ psl #2     | 0.110                       | 0.877                      | 7.973                                                      |
| 226 | $\Delta$ psl #3     | 0.122                       | 0.816                      | 6.689                                                      |
| 227 |                     |                             |                            |                                                            |
| 228 | WFPA 801 #1         | 0.107                       | 1.076                      | 10.056                                                     |
| 229 | WFPA 801 #2         | 0.112                       | 1.096                      | 9.786                                                      |
| 230 | WFPA 801 #3         | 0.126                       | 1.124                      | 8.921                                                      |
| 231 |                     |                             |                            |                                                            |
| 232 | WFPA 801 + ara #1   | 0.084                       | 1.050                      | 12.500                                                     |
| 233 | WFPA 801 + ara #2   | 0.086                       | 1.146                      | 13.326                                                     |
| 234 | WFPA 801 + ara #3   | 0.090                       | 1.158                      | 12.867                                                     |
| 235 |                     |                             |                            |                                                            |
| 236 | IgG Control #1      | 0.088                       | 0.906                      | 10.295                                                     |
| 237 | IgG Control #2      | 0.089                       | 0.988                      | 11.101                                                     |
| 238 | IgG Control #3      | 0.081                       | 0.892                      | 11.012                                                     |
| 239 |                     |                             |                            |                                                            |
| 240 | Class I #1          | 0.097                       | 1.064                      | 10.969                                                     |
| 241 | Class I #2          | 0.089                       | 1.030                      | 11.573                                                     |
| 242 | Class I #3          | 0.096                       | 1.132                      | 11.792                                                     |
| 243 |                     |                             |                            |                                                            |
| 244 | Class II #1         | 0.082                       | 0.986                      | 12.024                                                     |
| 245 | Class II #2         | 0.085                       | 1.014                      | 11.929                                                     |
| 246 | Class II #3         | 0.090                       | 1.024                      | 11.378                                                     |
| 247 |                     |                             |                            |                                                            |
| 248 | Class III #1        | 0.086                       | 1.032                      | 12.000                                                     |
| 249 | Class III #2        | 0.085                       | 1.028                      | 12.094                                                     |
| 250 | Class III #3        | 0.084                       | 1.018                      | 12.119                                                     |
| 251 |                     |                             |                            |                                                            |
| 252 | All 3 mAbs #1       | 0.081                       | 0.992                      | 12.247                                                     |

|     |               |       |       |        |
|-----|---------------|-------|-------|--------|
| 253 | All 3 mAbs #2 | 0.082 | 0.980 | 11.951 |
| 254 | All 3 mAbs #3 | 0.087 | 1.032 | 11.862 |
| 255 |               |       |       |        |
| 256 |               |       |       |        |

257 *Experiment 4*

| 258 |                   |                             |                             |                                                            |
|-----|-------------------|-----------------------------|-----------------------------|------------------------------------------------------------|
| 259 | <u>Condition</u>  | <u>O.D. A<sub>600</sub></u> | <u>O.D. A<sub>490</sub></u> | <u>Aggregation Index (A<sub>490</sub>/A<sub>600</sub>)</u> |
| 260 |                   |                             |                             |                                                            |
| 261 | $\Delta$ psl #1   | 0.198                       | 0.973                       | 4.914                                                      |
| 262 | $\Delta$ psl #2   | 0.209                       | 0.903                       | 4.321                                                      |
| 263 | $\Delta$ psl #3   | 0.208                       | 0.991                       | 4.764                                                      |
| 264 |                   |                             |                             |                                                            |
| 265 | WFPA 801 #1       | 0.213                       | 1.078                       | 5.061                                                      |
| 266 | WFPA 801 #2       | 0.215                       | 1.184                       | 5.507                                                      |
| 267 | WFPA 801 #3       | 0.249                       | 1.166                       | 4.683                                                      |
| 268 |                   |                             |                             |                                                            |
| 269 | WFPA 801 + ara #1 | 0.104                       | 1.002                       | 9.635                                                      |
| 270 | WFPA 801 + ara #2 | 0.106                       | 0.980                       | 9.245                                                      |
| 271 | WFPA 801 + ara #3 | 0.098                       | 1.042                       | 10.633                                                     |
| 272 |                   |                             |                             |                                                            |
| 273 | IgG Control #1    | 0.109                       | 1.022                       | 9.376                                                      |
| 274 | IgG Control #2    | 0.101                       | 1.018                       | 10.079                                                     |
| 275 | IgG Control #3    | 0.105                       | 1.058                       | 10.076                                                     |
| 276 |                   |                             |                             |                                                            |
| 277 | Class I #1        | 0.132                       | 0.894                       | 6.773                                                      |
| 278 | Class I #2        | 0.124                       | 0.838                       | 6.758                                                      |
| 279 | Class I #3        | 0.134                       | 0.928                       | 6.925                                                      |
| 280 |                   |                             |                             |                                                            |
| 281 | Class II #1       | 0.132                       | 0.950                       | 7.197                                                      |
| 282 | Class II #2       | 0.142                       | 0.966                       | 6.803                                                      |
| 283 | Class II #3       | 0.138                       | 1.114                       | 8.072                                                      |
| 284 |                   |                             |                             |                                                            |
| 285 | Class III #1      | 0.140                       | 1.098                       | 7.843                                                      |
| 286 | Class III #2      | 0.133                       | 1.050                       | 7.895                                                      |
| 287 | Class III #3      | 0.130                       | 1.062                       | 8.169                                                      |
| 288 |                   |                             |                             |                                                            |
| 289 | All 3 mAbs #1     | 0.153                       | 1.006                       | 6.575                                                      |
| 290 | All 3 mAbs #2     | 0.161                       | 1.106                       | 6.870                                                      |
| 291 | All 3 mAbs #3     | 0.164                       | 1.080                       | 6.585                                                      |
| 292 |                   |                             |                             |                                                            |

293

294 **References**

295 1 Li, H. *et al.* Epitope mapping of monoclonal antibodies using synthetic  
296 oligosaccharides uncovers novel aspects of immune recognition of the Psl  
297 exopolysaccharide of *Pseudomonas aeruginosa*. *Chemistry* **19**, 17425-17431,  
298 doi:10.1002/chem.201302916 (2013).

299
